# Supplementary material for: Selective fluorescent probe for Tl3+ ions through metal-induced hydrolysis and its application for direct assay of artificial urine
Source: Royal Society of Chemistry journal article supplement (doi:10.1039/d4ra06726f), 2025-01-01
Supplement: d4ra06726f1.pdf [file d4ra06726f1.pdf]

## Electronic Supplementary Information

### Selective fluorescent probe for $Tl^{3+}$ ions through metal-induced hydrolysis and its application for direct assay of artificial urine

Myung Gil Choi, Yerin Jang, Mi Gang Kim, Sangdoo Ahn\* and Suk-Kyu Chang\*

*Department of Chemistry, Chung-Ang University, Seoul 06974, Republic of Korea*

#### Contents

##### Experimental details

- Table S1.** Representative  $Tl^{3+}$  signaling sensors and reaction-based probes reported previously
- Table S2.** Photophysical properties of **TP-1** and **TP-2** in the presence and absence of  $Tl^{3+}$  ions
- Fig. S1.** UV-vis spectra of (a) **TP-1** and (b) **TP-2** in the presence and absence of  $Tl^{3+}$ .
- Fig. S2.** Time-dependent fluorescence emission of **TP-1** at 443 nm in response to  $Tl^{3+}$ .
- Fig. S3.** Time-dependent fluorescence emission of **TP-2** at 455 nm in response to  $Tl^{3+}$ .
- Fig. S4.** Changes in fluorescence intensity enhancement ( $I/I_0$ ) at 443 nm of **TP-1** in the presence of common anions. Inset: fluorescence spectra of **TP-1**.
- Fig. S5.** Changes in fluorescence intensity ratio ( $I_{\text{anion}+Tl(III)}/I_{Tl(III)}$ ) of **TP-1** at 443 nm in the presence of coexisting anions.
- Fig. S6.** Changes in fluorescence intensity enhancement ( $I/I_0$ ) of **TP-1** at 443 nm in the presence of urine components.
- Fig. S7.** Partial  $^1H$  NMR spectra of (a) **TP-1**, (b) **TP-1** +  $Tl^{3+}$ , and (c) 2-acetyl-6-methoxynaphthalene in  $DMSO-d_6$ .
- Fig. S8.** Mass spectrum of the  $Tl^{3+}$  signaling product of **TP-1**.

- Fig. S9.** TLC profile of **TP-1** (spot A), **TP-1** with  $\text{Ti}^{3+}$  (2.0 eq.) (spot B), and 2-acetyl-6-methoxynaphthalene (spot C).
- Fig. S10.** Effect of pH on the  $\text{Ti}^{3+}$  signaling of **TP-1** expressed by changes in fluorescence intensity at 443 nm.
- Fig. S11.** Stability of **TP-1** stock solution over different storage durations.
- Fig. S12.**  $^1\text{H}$  NMR spectrum of **TP-1** in  $\text{DMSO-}d_6$  (600 MHz).
- Fig. S13.**  $^{13}\text{C}$  NMR spectrum of **TP-1** in  $\text{DMSO-}d_6$  (150 MHz).
- Fig. S14.** HSQC NMR spectrum of **TP-1** in  $\text{DMSO-}d_6$ .
- Fig. S15.** HMBC NMR spectrum of **TP-1** in  $\text{DMSO-}d_6$ .
- Fig. S16.** High-resolution mass spectrum of **TP-1**.
- Fig. S17.** HPLC chromatogram of **TP-1**.
- Fig. S18.**  $^1\text{H}$  NMR spectrum of **TP-2** in  $\text{DMSO-}d_6$  (600 MHz).
- Fig. S19.**  $^{13}\text{C}$  NMR spectrum of **TP-2** in  $\text{DMSO-}d_6$  (150 MHz).
- Fig. S20.** High-resolution mass spectrum of **TP-2**.
- Fig. S21.** HPLC chromatogram of **TP-2**.

## **Experimental details**

### **1. General**

Fluorophores 2-acetyl-6-methoxynaphthalene and 6-methoxy-2-naphthaldehyde were purchased from Tokyo Chemical Industry Co. (TCI). Hydrazine monohydrate was obtained from Yakuri Pure Chemicals Co. NMR ( $^1\text{H}$  and  $^{13}\text{C}$ ) spectra were measured using a Varian VNS NMR spectrometer. High-resolution mass spectrometry (HRMS) was conducted using a JEOL JMS-700 mass spectrometer with electron ionization (EI). UV-vis and fluorescence spectra were measured using Scinco S-3100 and FS-2 spectrophotometers, respectively.

**Table S1.** Representative Tl<sup>3+</sup> signaling sensors and reaction-based probes reported previously

| Structure                                                                           | Signal       | Conditions                                     | Mechanism                                                                        | LOD                           | Application                                                    | Merit                                                                                                     | Ref. |
|-------------------------------------------------------------------------------------|--------------|------------------------------------------------|----------------------------------------------------------------------------------|-------------------------------|----------------------------------------------------------------|-----------------------------------------------------------------------------------------------------------|------|
| 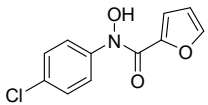   | Colorimetry  | pH 7.0 aqueous solution with 0.1% acetonitrile | Tl <sup>3+</sup> -hydroxamic acid complex formation                              | -                             | Tl <sup>3+</sup> assay in standard samples                     | <ul style="list-style-type: none"> <li>• Naked eye detection</li> </ul>                                   | S1   |
|    | Colorimetry  | Glycine-HCl buffer (pH 1.0)                    | Tl <sup>3+</sup> -2,6-bis( <i>N</i> -phenyl carbamoyl)pyridine complex formation | 1.2 nM (pre-concentration)    | Tl <sup>3+</sup> assay in environmental and biological samples | <ul style="list-style-type: none"> <li>• Naked eye detection</li> <li>• High sensitivity</li> </ul>       | S2   |
|    | Colorimetry  | H <sub>2</sub> PO <sub>4</sub> solution        | Oxidation of trifluoperazine                                                     | 26,000 nM                     | Tl <sup>3+</sup> assay in environmental and biological samples | <ul style="list-style-type: none"> <li>• Naked eye detection</li> <li>• Biological application</li> </ul> | S3   |
|  | Fluorescence | Acetone containing 10% HCl                     | Oxidation of arsenoxylphenylazo rhodanine                                        | 0.0013 nM (pre-concentration) | Tl <sup>3+</sup> assay in environmental samples                | <ul style="list-style-type: none"> <li>• High sensitivity</li> </ul>                                      | S4   |

**Table S1.** Representative Tl<sup>3+</sup> signaling sensors and reaction-based probes reported previously (*continued*)

| Structure                                                                           | Signal                    | Conditions                                 | Mechanism                                        | LOD       | Application                                                       | Merit                                                                                                                                          | Ref.      |
|-------------------------------------------------------------------------------------|---------------------------|--------------------------------------------|--------------------------------------------------|-----------|-------------------------------------------------------------------|------------------------------------------------------------------------------------------------------------------------------------------------|-----------|
| 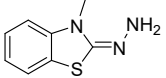   | Colorimetry               | H <sub>2</sub> PO <sub>4</sub> solution    | Oxidative coupling of <b>MBTH</b> and <b>IDH</b> | 72,000 nM | Tl <sup>3+</sup> assay in environmental and biological samples    | <ul style="list-style-type: none"> <li>• Naked eye detection</li> <li>• Biological application</li> </ul>                                      | S5        |
|    | Colorimetry, Fluorescence | pH 4.76 acetate buffer with 20% (v/v) DMSO | Hydrolysis of sulfonhydrazide                    | 190 nM    | Tl <sup>3+</sup> assay in commercial reagent using office scanner | <ul style="list-style-type: none"> <li>• Naked eye detection</li> <li>• IT-device-based technique</li> </ul>                                   | S6        |
|   | Colorimetry, Fluorescence | pH 4.2 acetate buffer with 30% (v/v) DMSO  | Hydrolysis of hydroxamate                        | 290 nM    | Tl <sup>3+</sup> assay in biological samples using smartphone     | <ul style="list-style-type: none"> <li>• Naked eye detection</li> <li>• Biological application</li> <li>• IT-device-based technique</li> </ul> | S7        |
|  | Fluorescence              | pH 4.8 acetate buffer with 1% (v/v) DMF    | Hydrolysis of hydrazone                          | 19 nM     | Tl <sup>3+</sup> assay in biological samples using smartphone     | <ul style="list-style-type: none"> <li>• High sensitivity</li> <li>• Biological application</li> <li>• IT-device-based technique</li> </ul>    | This work |

**Table S2.** Photophysical properties of **TP-1** and **TP-2** in the presence and absence of  $\text{Ti}^{3+}$  ions

|                                           | <b>Maximum <math>\lambda_{\text{abs}}</math><br/>(nm)</b> | <b>Molar extinction coefficient (<math>\epsilon</math>)<br/>(<math>\text{cm}^{-1}\text{M}^{-1}</math>)</b> | <b>Maximum <math>\lambda_{\text{em}}</math><br/>(nm)</b> | <b>Quantum yield<br/>(<math>\Phi</math>)<sup>[a]</sup></b> |
|-------------------------------------------|-----------------------------------------------------------|------------------------------------------------------------------------------------------------------------|----------------------------------------------------------|------------------------------------------------------------|
| <b>TP-1 only</b>                          | 292                                                       | 14,704                                                                                                     | 435                                                      | 0.011                                                      |
| <b>TP-1 + <math>\text{Ti}^{3+}</math></b> | 310                                                       | 11,256                                                                                                     | 443                                                      | 0.33                                                       |
| <b>TP-2 only</b>                          | 306                                                       | 19,682                                                                                                     | 436                                                      | 0.015                                                      |
| <b>TP-2 + <math>\text{Ti}^{3+}</math></b> | 315                                                       | 10,974                                                                                                     | 455                                                      | 0.20                                                       |

[a] Fluorescence quantum yields were measured by comparing with anthracene as a reference ( $\Phi_{\text{anthracene}} = 0.27$ , ethanol).<sup>S8</sup>

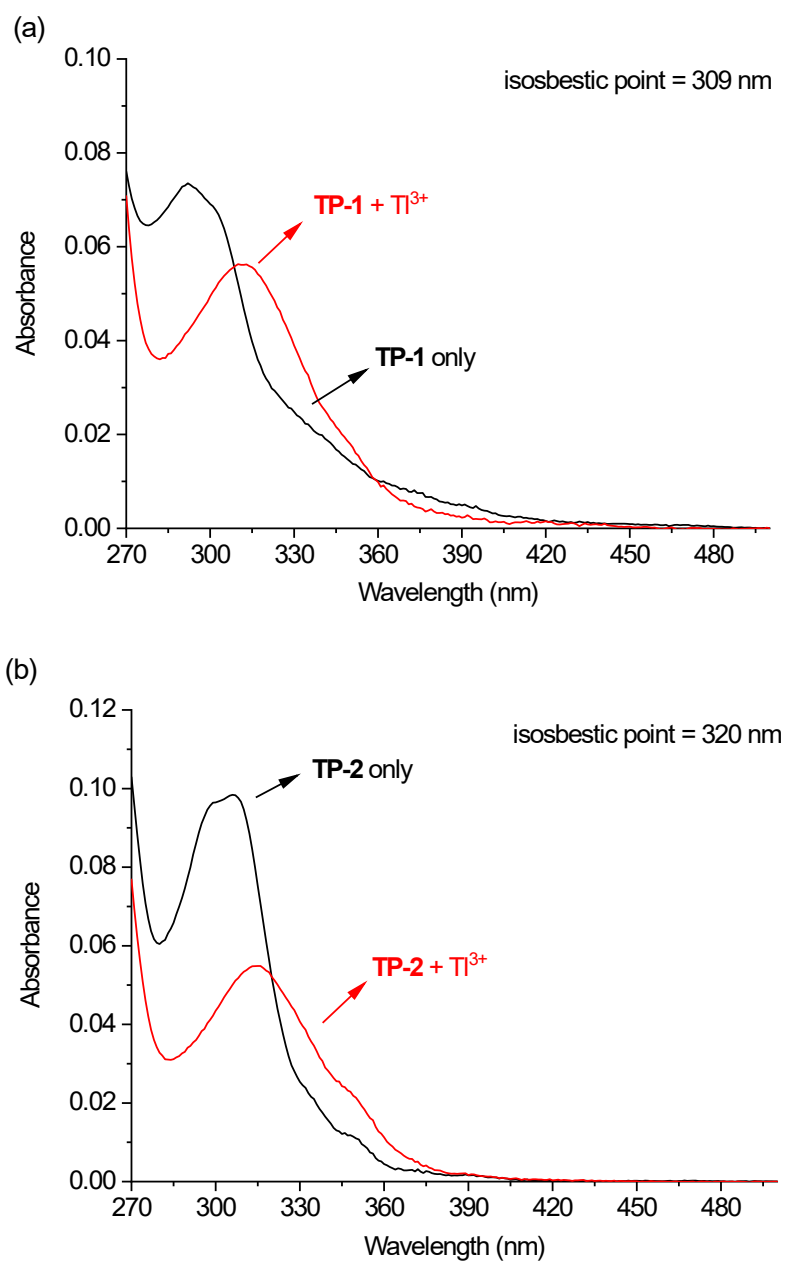

**Fig. S1.** UV-vis spectra of (a) TP-1 and (b) TP-2 in the presence and absence of Ti<sup>3+</sup>. [TP-1] = [TP-2] = 5.0 μM, [Ti<sup>3+</sup>] = 50 μM, in a pH 4.8 acetate buffer solution (10 mM) containing 1% (v/v) DMF.

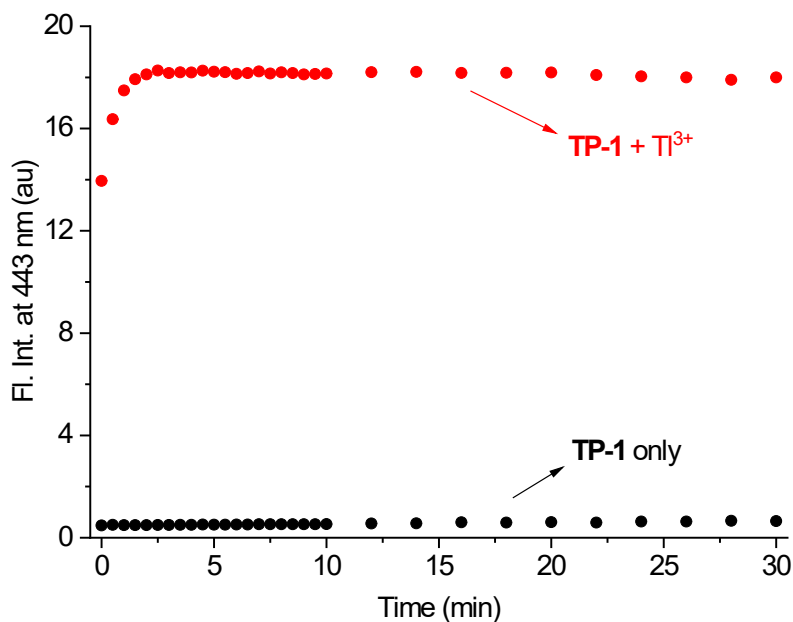

**Fig. S2.** Time-dependent fluorescence emission of **TP-1** at 443 nm in response to  $Tl^{3+}$ . [**TP-1**] = 5.0  $\mu$ M, [ $Tl^{3+}$ ] = 50  $\mu$ M, in a pH 4.8 acetate buffer solution (10 mM) containing 1% (v/v) DMF.  $\lambda_{ex}$  = 309 nm.

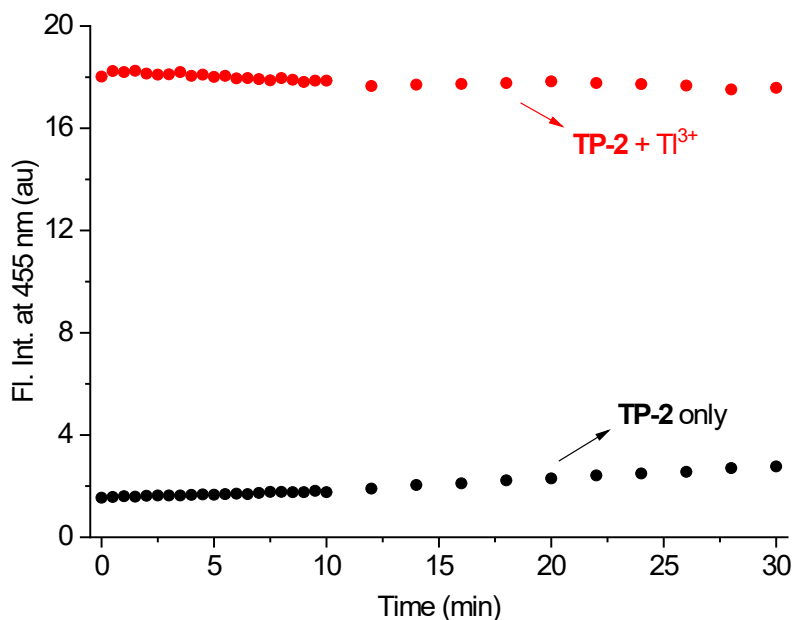

**Fig. S3.** Time-dependent fluorescence emission of **TP-2** at 455 nm in response to  $Tl^{3+}$ . [**TP-2**] = 5.0  $\mu$ M, [ $Tl^{3+}$ ] = 50  $\mu$ M, in a pH 4.8 acetate buffer solution (10 mM) containing 1% (v/v) DMF.  $\lambda_{ex}$  = 320 nm.



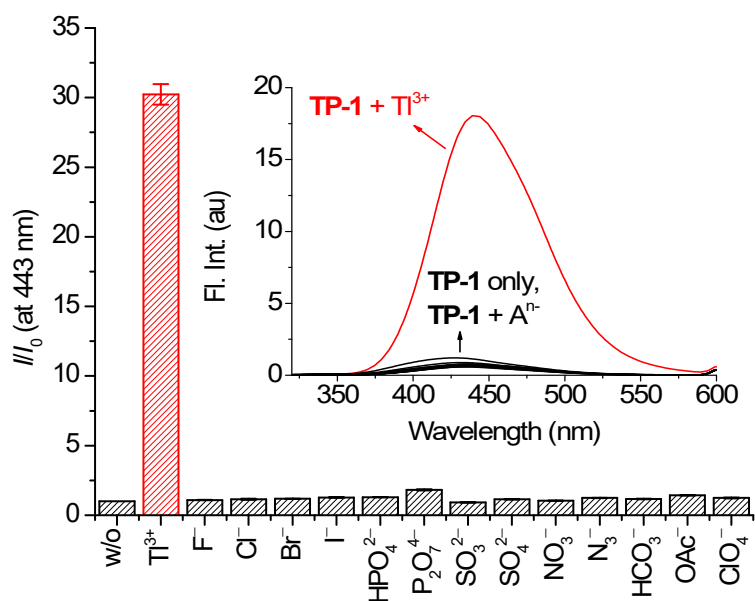

**Fig. S4.** Changes in fluorescence intensity enhancement ( $I/I_0$ ) at 443 nm of **TP-1** in the presence of common anions. Inset: fluorescence spectra of **TP-1**. [**TP-1**] = 5.0  $\mu$ M, [ $Tl^{3+}$ ] = [ $A^{n-}$ ] = 50  $\mu$ M, in a pH 4.8 acetate buffer solution (10 mM) containing 1% (v/v) DMF.  $\lambda_{ex}$  = 309 nm.

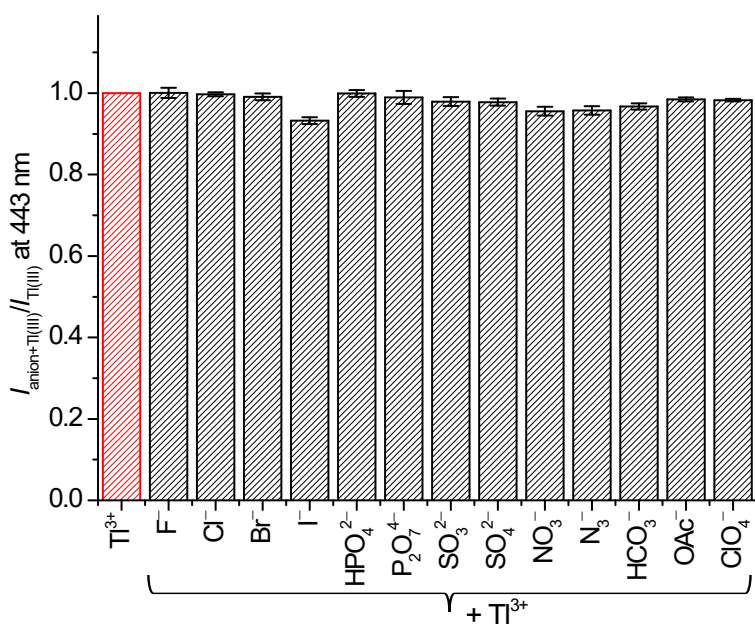

**Fig. S5.** Changes in fluorescence intensity ratio ( $I_{anion+Tl(III)}/I_{Tl(III)}$ ) of **TP-1** at 443 nm in the presence of coexisting anions. [**TP-1**] = 5.0  $\mu$ M, [ $Tl^{3+}$ ] = [ $A^{n-}$ ] = 50  $\mu$ M, in a pH 4.8 acetate buffer solution (10 mM) containing 1% (v/v) DMF.  $\lambda_{ex}$  = 309 nm.

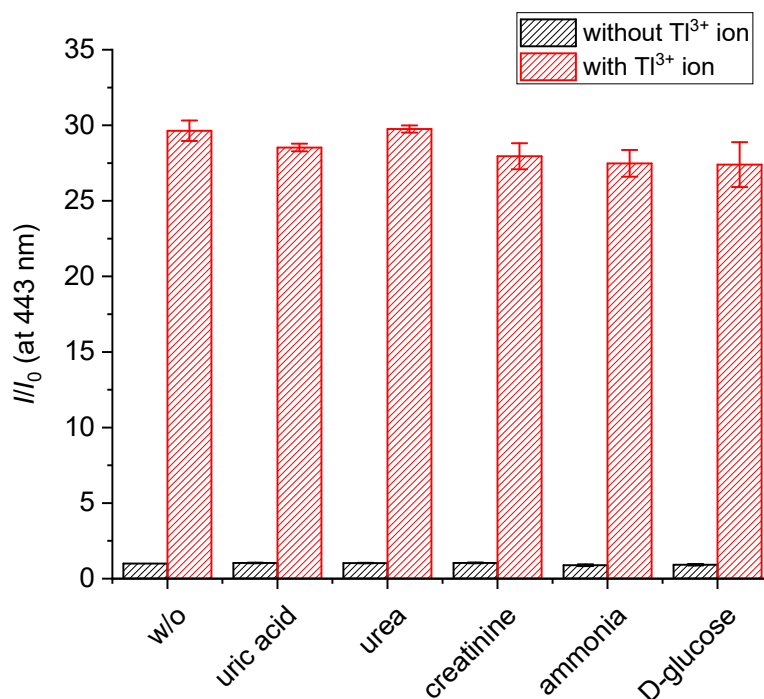

**Fig. S6.** Changes in fluorescence intensity enhancement ( $I/I_0$ ) of **TP-1** at 443 nm in the presence of urine components. [**TP-1**] = 5.0  $\mu$ M, [ $Ti^{3+}$ ] = [urine component] = 50  $\mu$ M, in a pH 4.8 acetate buffer solution (10 mM) containing 1% (v/v) DMF.  $\lambda_{ex}$  = 309 nm.

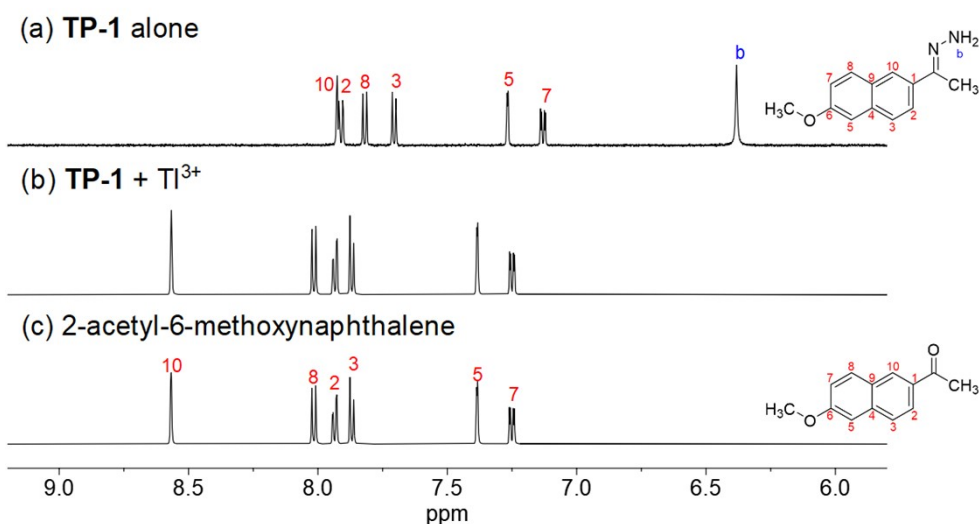

**Fig. S7.** Partial  $^1H$  NMR spectra of (a) **TP-1**, (b) **TP-1** +  $Ti^{3+}$ , and (c) 2-acetyl-6-methoxynaphthalene in  $DMSO-d_6$ . [**TP-1**] = [2-acetyl-6-methoxynaphthalene] = 5.0 mM. For (b), the spectrum (**TP-1** +  $Ti^{3+}$ ) was obtained using a purified product of a mixture of **TP-1** (5.0 mM) and  $Ti(NO_3)_3$  (10.0 mM) in acetate buffer solution (pH 4.8) containing 1% (v/v) DMF.

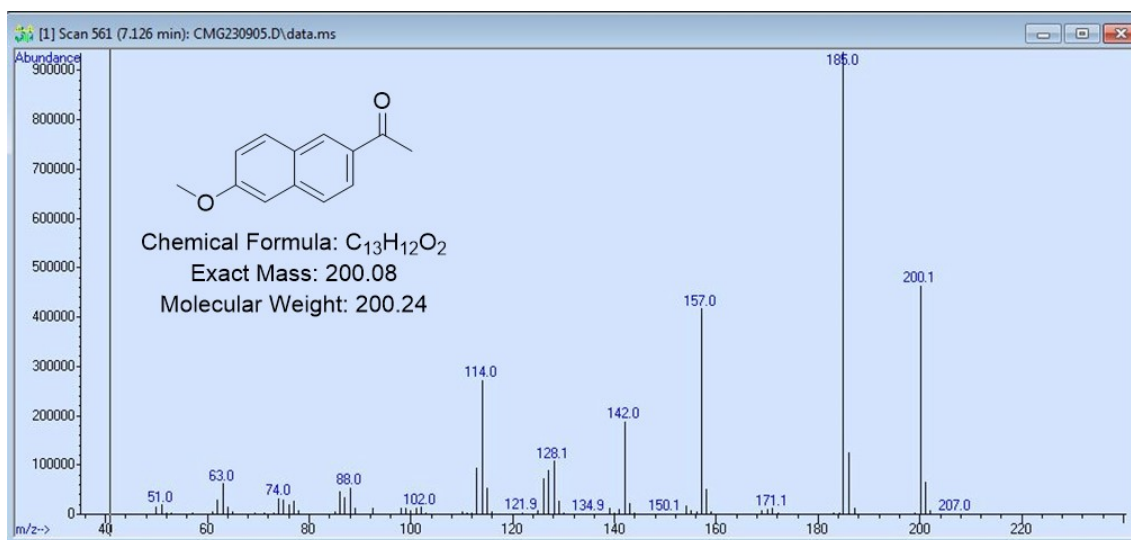

**Fig. S8.** Mass spectrum of the  $Tl^{3+}$  signaling product of TP-1.

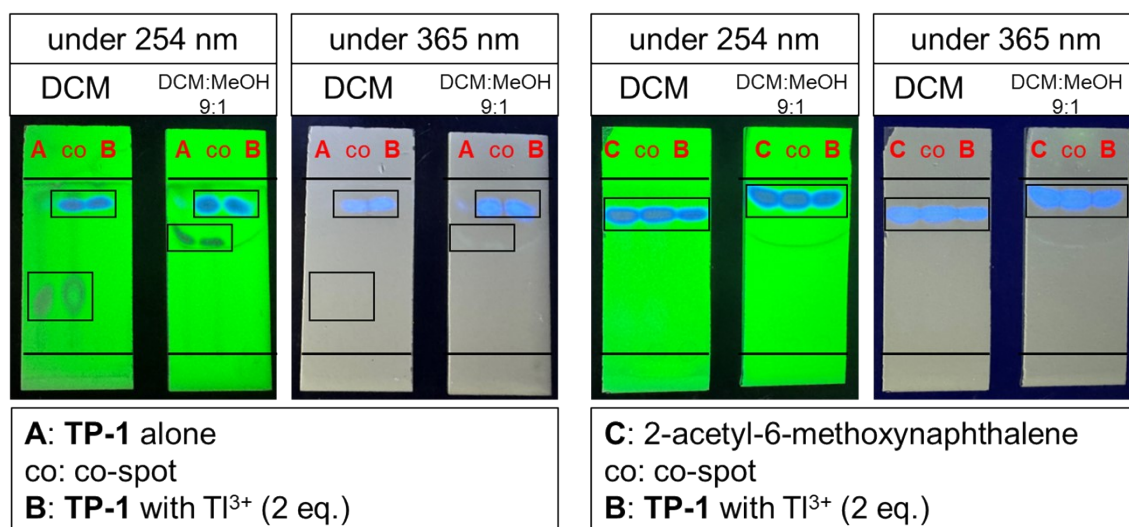

**Fig. S9.** TLC profile of TP-1 (spot A), TP-1 with  $Tl^{3+}$  (2.0 eq.) (spot B), and 2-acetyl-6-methoxynaphthalene (spot C).

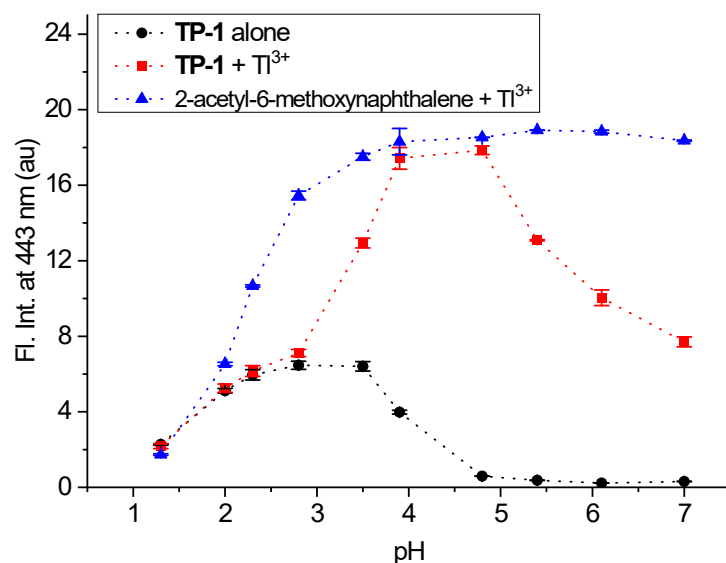

**Fig. S10.** Effect of pH on the Tl<sup>3+</sup> signaling of TP-1 expressed by changes in fluorescence intensity at 443 nm. [TP-1] = [2-acetyl-6-methoxynaphthalene] = 5.0  $\mu$ M, [Tl<sup>3+</sup>] = 50  $\mu$ M, in a pH 4.8 acetate buffer solution (10 mM) containing 1% (v/v) DMF. HCl or NaOH solution was added to adjust the pH.  $\lambda_{\text{ex}} = 309$  nm.

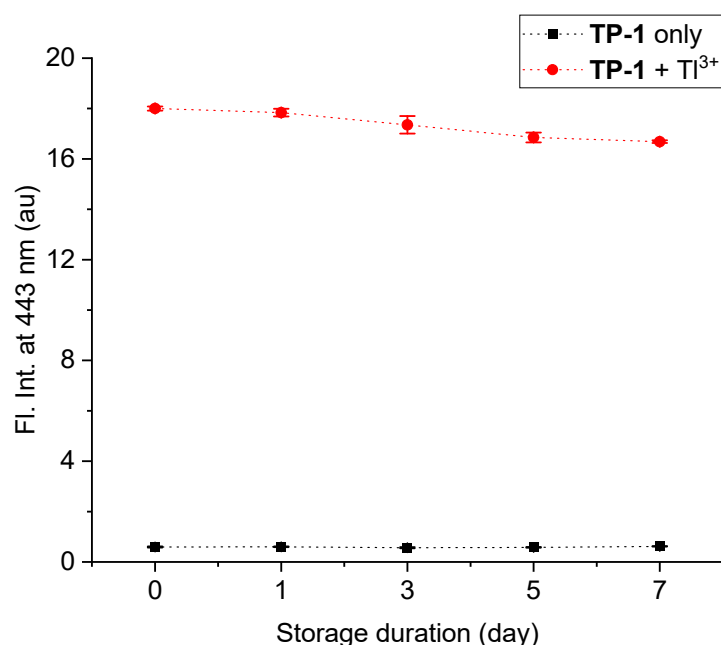

**Fig. S11.** Stability of TP-1 stock solution over different storage durations. [TP-1] = 5.0  $\mu$ M, [Tl<sup>3+</sup>] = 50  $\mu$ M, in a pH 4.8 acetate buffer solution (10 mM) containing 1% (v/v) DMF. The stock solutions were used after being stored for immediate use, 1 day, 3 days, 5 days, and 1 week at room temperature in the dark.  $\lambda_{\text{ex}} = 309$  nm.

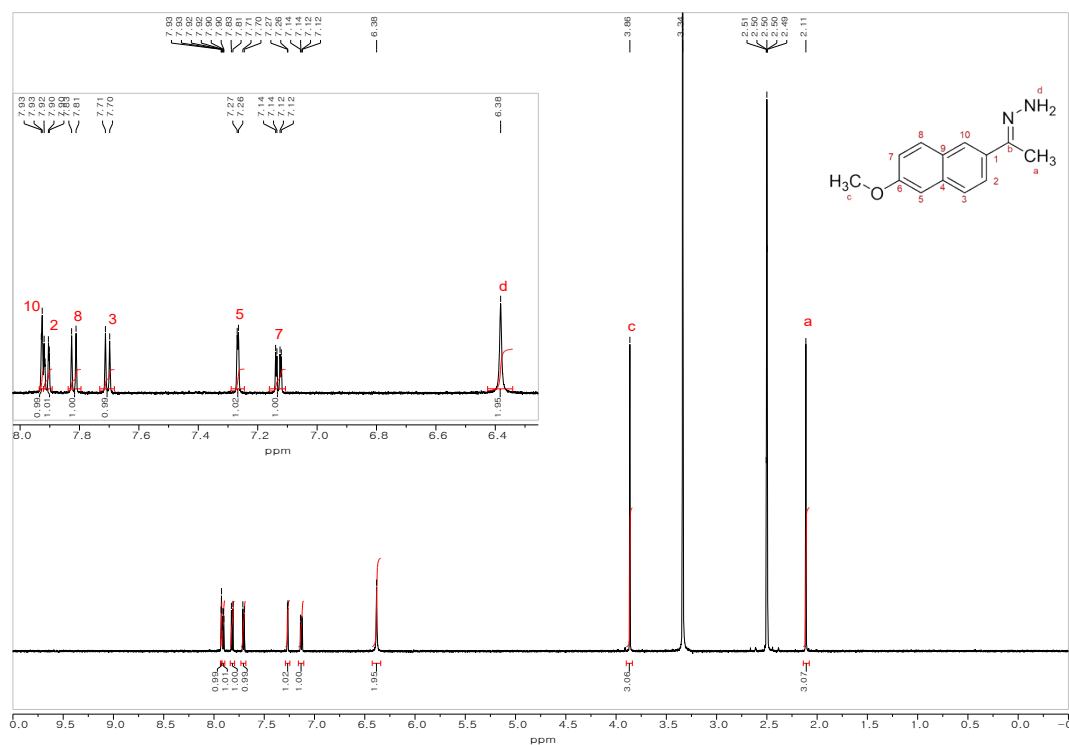

**Fig. S12.** <sup>1</sup>H NMR spectrum of TP-1 in DMSO-*d*<sub>6</sub> (600 MHz).

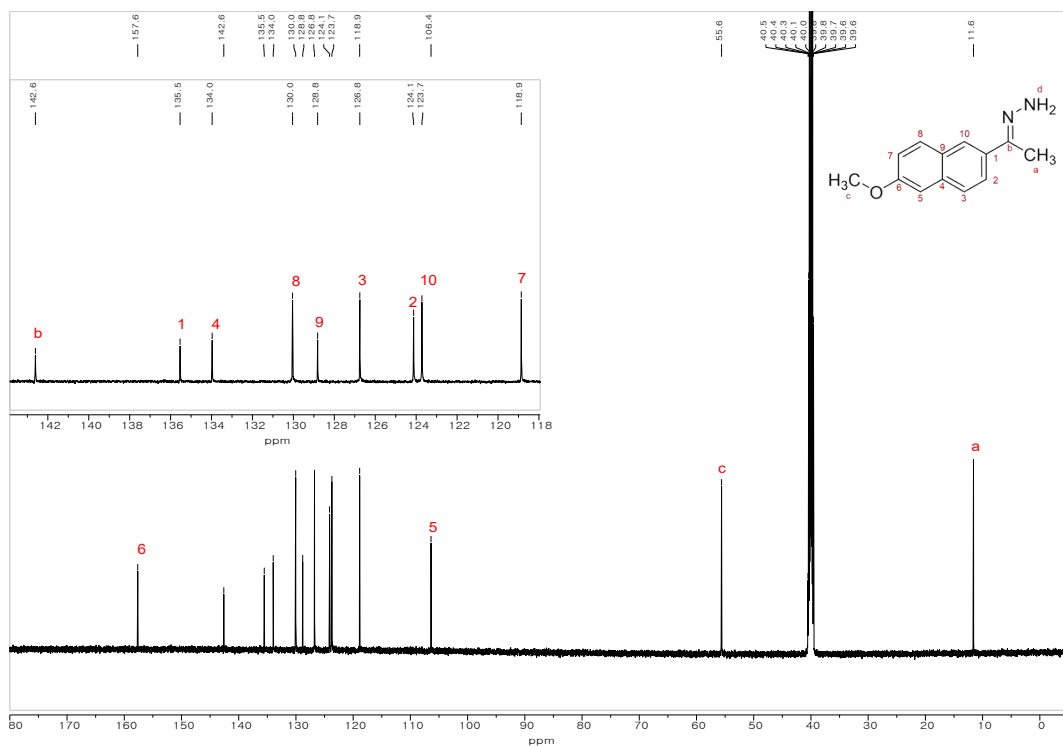

**Fig. S13.** <sup>13</sup>C NMR spectrum of TP-1 in DMSO-*d*<sub>6</sub> (150 MHz).

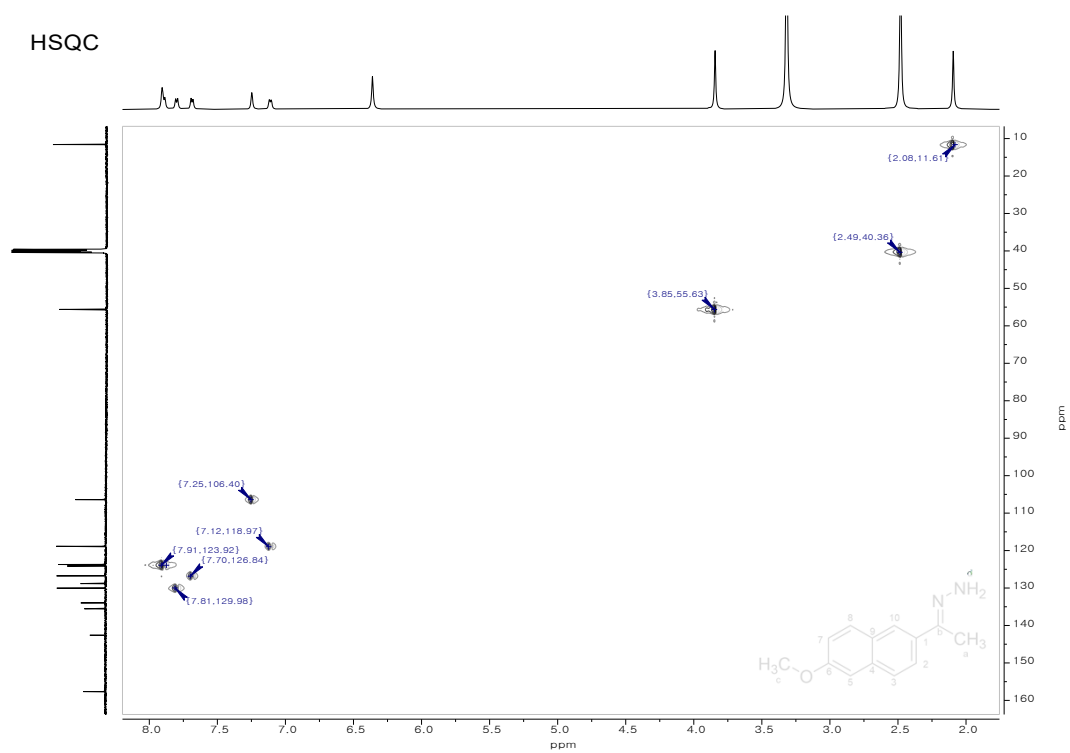

**Fig. S14.** HSQC NMR spectrum of TP-1 in DMSO-*d*<sub>6</sub>.

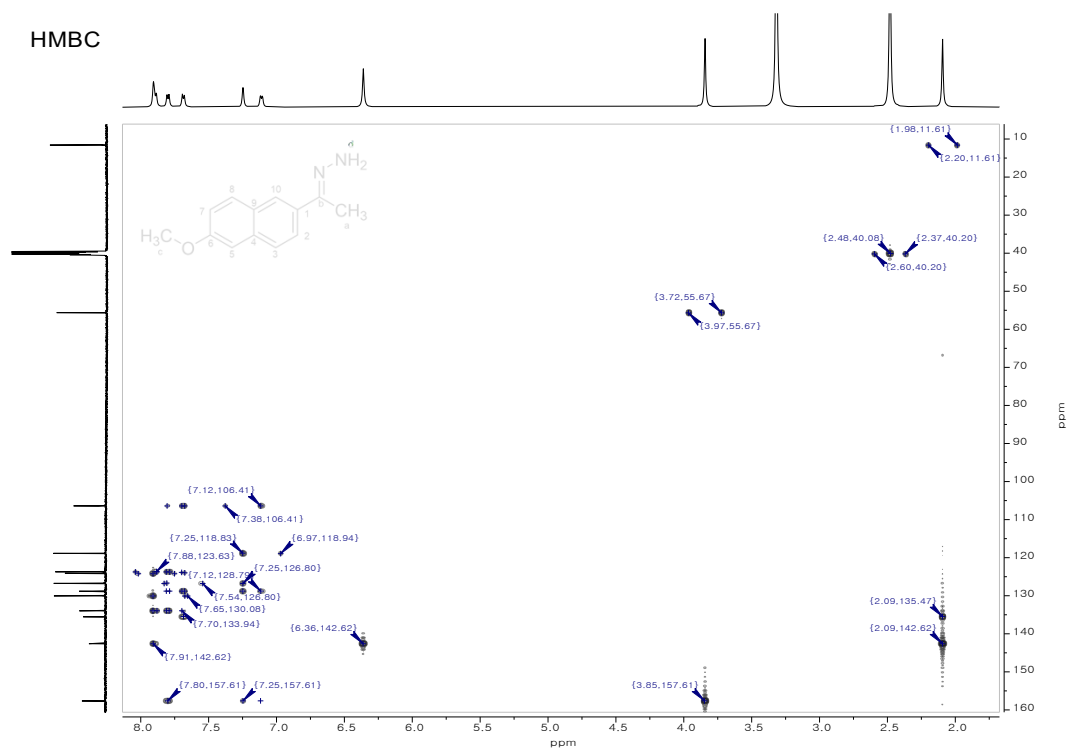

**Fig. S15.** HMBC NMR spectrum of TP-1 in DMSO-*d*<sub>6</sub>.

[ Mass Spectrum ]  
 Data : EI-D630 Date : 02-Aug-2023 10:27  
 RT : 0.55 min Scan# : (10,13)  
 Elements : C 100/0, H 100/0, N 5/0, O 5/0  
 Mass Tolerance : 10ppm, 5mmu if m/z < 500, 10mmu if m/z > 1000  
 Unsaturation (U.S.) : -0.5 - 20.0

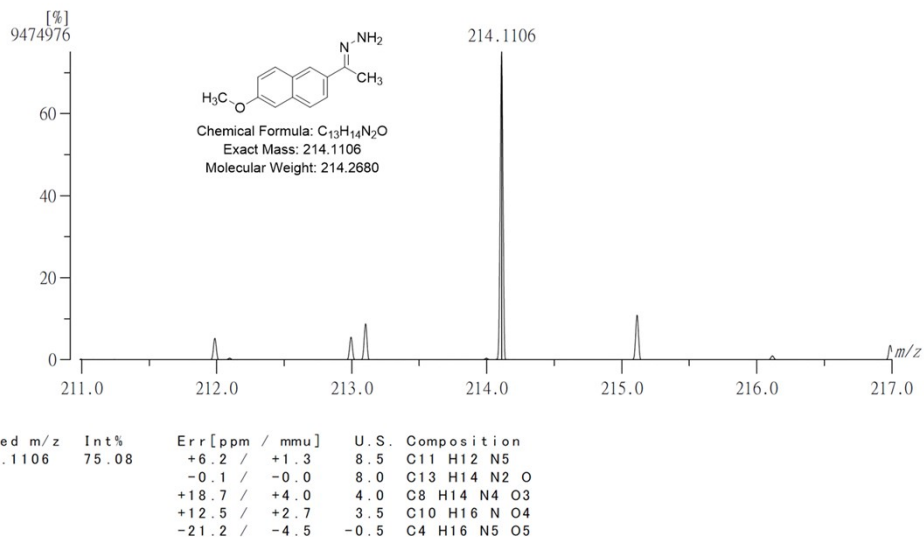

Fig. S16. High-resolution mass spectrum of TP-1.

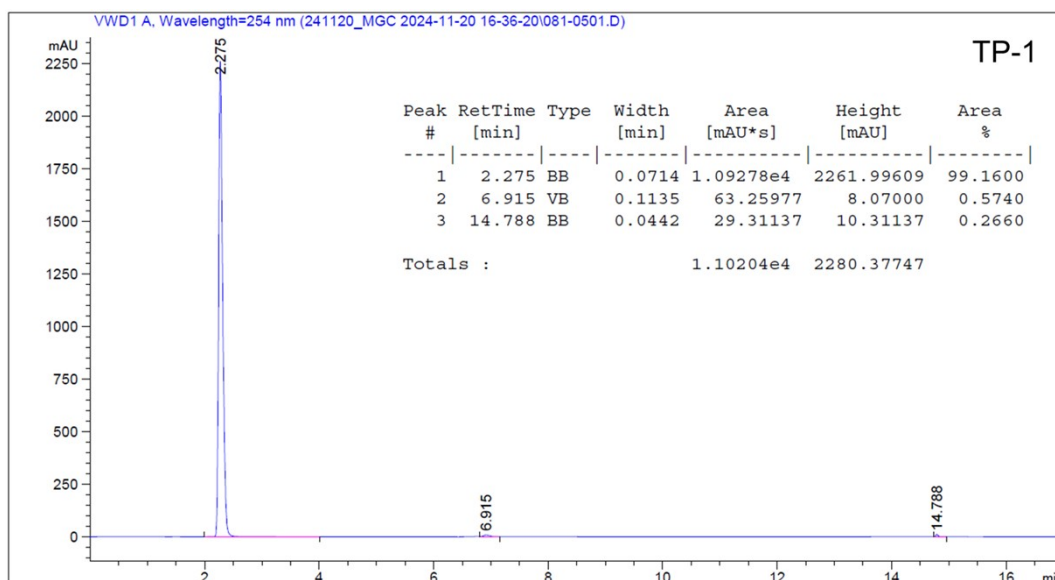

Fig. S17. HPLC chromatogram of TP-1. Column: C18 column, mobile phase: H<sub>2</sub>O:CH<sub>3</sub>CN = 8:2 (v/v), flow rate: 1 mL/min, detection: Abs at 254 nm.

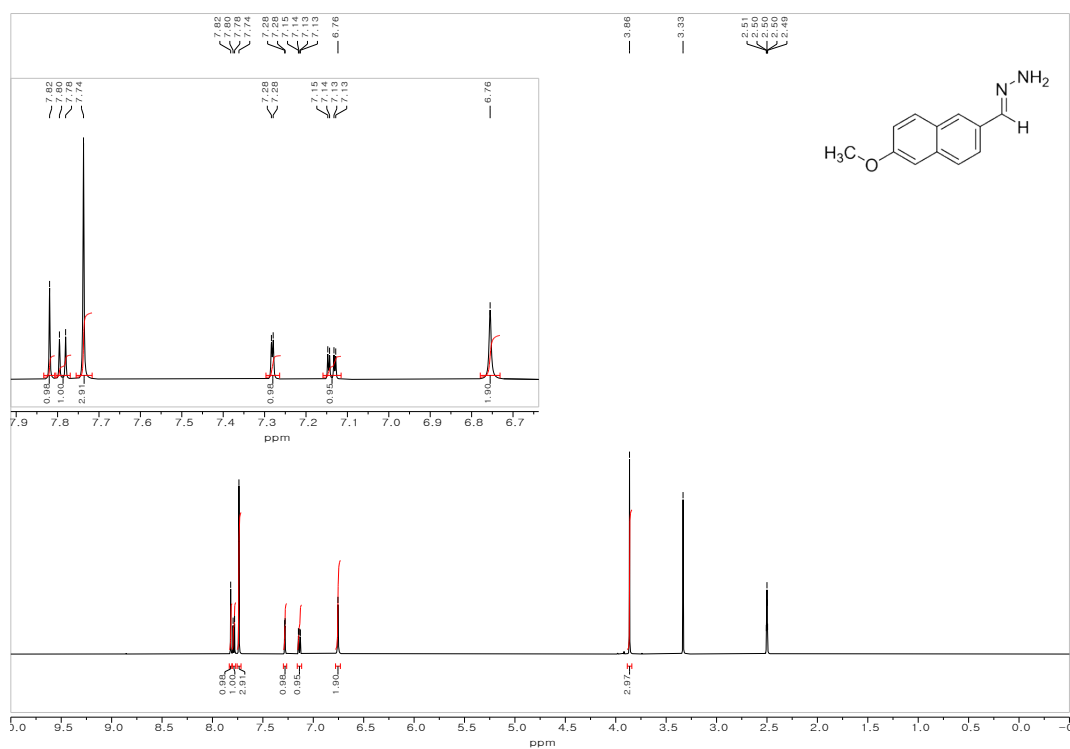

**Fig. S18.** <sup>1</sup>H NMR spectrum of TP-2 in DMSO-*d*<sub>6</sub> (600 MHz).

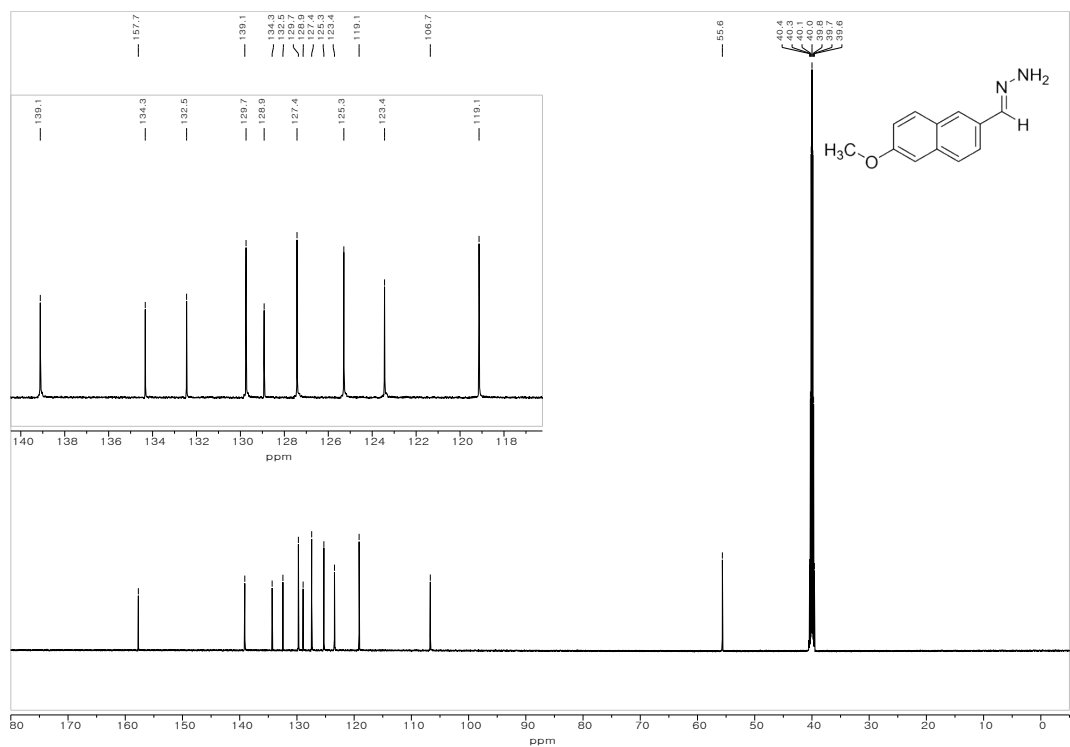

**Fig. S19.** <sup>13</sup>C NMR spectrum of TP-2 in DMSO-*d*<sub>6</sub> (150 MHz).



[ Mass Spectrum ]  
 Data : EI-D629 Date : 02-Aug-2023 10:20  
 RT : 0.48 min Scan#: (9.19)  
 Elements : C 100/0, H 100/0, N 5/0, O 5/0  
 Mass Tolerance : 10ppm, 5mmu if m/z < 500, 10mmu if m/z > 1000  
 Unsaturation (U.S.) : -0.5 - 20.0

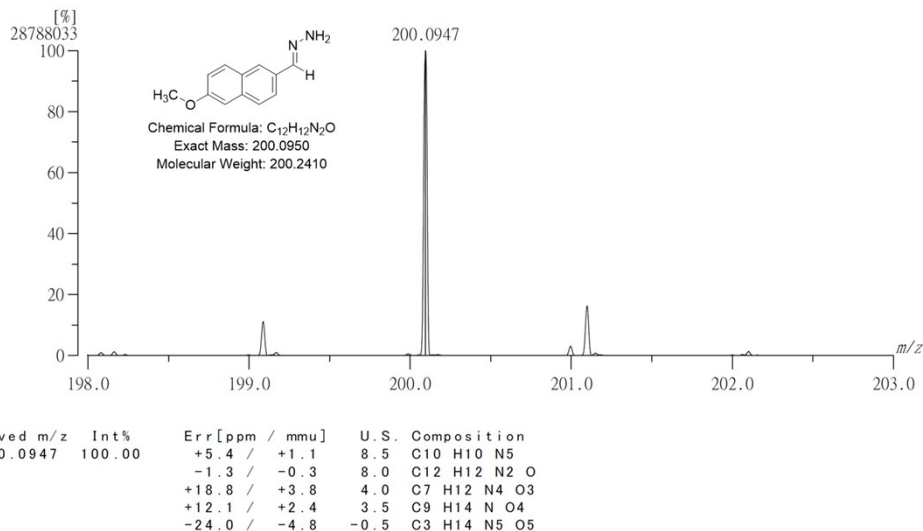

Fig. S20. High-resolution mass spectrum of TP-2.

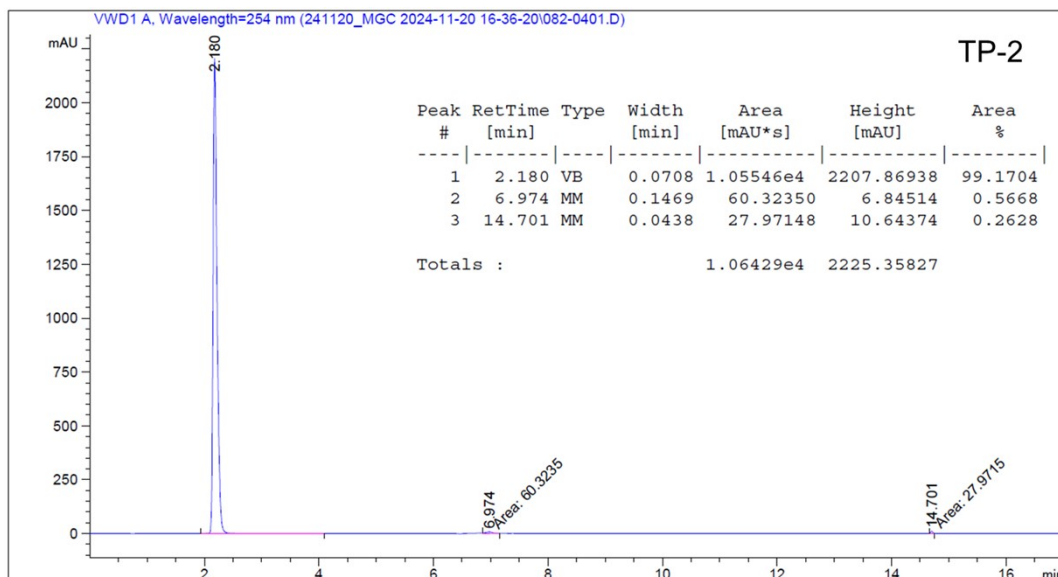

Fig. S21. HPLC chromatogram of TP-2. Column: C18 column, mobile phase: H<sub>2</sub>O:CH<sub>3</sub>CN = 8:2 (v/v), flow rate: 1 mL/min, detection: Abs at 254 nm.

## **References**

- [S1] Y. K. Agrawal and V. J. Bhatt, *Analyst*, 1986, **111**, 761–765.
- [S2] B. Rezaei, S. Meghdadi and N. Majidi, *Spectrochim. Acta Part A*, 2007, **67**, 92–97.
- [S3] H. D. Revanasiddappa and T. N. K. Kumar, *Anal. Sci.*, 2002, **18**, 1131–1135.
- [S4] S. Ge, P. Dai, J. Yu, Y. Zhu, J. Huang, C. Zhang, L. Ge and F. Wan, *Intern. J. Environ. Anal. Chem.*, 2010, **90**, 1139–1147.
- [S5] P. Nagaraja, N. G. S. Al-Tayar, A. Shivakumar, A. K. Shresta and A. K. Gowda, *J. Mex. Chem. Soc.*, 2009, **53**, 201–208.
- [S6] Y. J. Lee, M. G. Choi, J. H. Yoo, T. J. Park, S. Ahn and S.-K. Chang, *J. Photochem. Photobiol. A*, 2020, **394**, 112471.
- [S7] J. H. Yoo, Y. J. Lee, K. M. Lee, M. G. Choi, T. J. Park and S.-K. Chang, *New J. Chem.*, 2021, **45**, 603–609.
- [S8] W. H. Melhuish, *J. Phys. Chem.*, 1961, **65**, 229–235.
